# Supplementary material for: Targeting PFKFB3 alleviates cerebral ischemia-reperfusion injury in mice
Source: PubMed Central journal article supplement (PMC6691133; doi:10.1038/s41598-019-48196-z), 2019-08-12
Supplement: 41598_2019_48196_MOESM1_ESM.pdf [file 41598_2019_48196_MOESM1_ESM.pdf]

## SUPPLEMENTARY INFORMATION

### **Targeting PFKFB3 alleviates cerebral ischemia-reperfusion injury in mice**

Olga Burmistrova<sup>1\*</sup>, Ana Olias-Arjona<sup>2\*</sup>, Rebeca Lapresa<sup>2,3</sup>, Daniel Jimenez-Blasco<sup>2,3,4</sup>, Tatiana Eremeeva<sup>1</sup>, Dmitry Shishov<sup>1</sup>, Sergei Romanov<sup>5</sup>, Kristina Zakurdaeva<sup>1</sup>, Angeles Almeida<sup>2,3</sup>, Peter O. Fedichev<sup>1#</sup>, Juan P. Bolaños<sup>2,3,4#</sup>

<sup>1</sup>Gero Discovery LLC, Moscow, Russia

<sup>2</sup>Institute of Functional Biology and Genomics (IBFG), Universidad de Salamanca, CSIC, Salamanca, Spain

<sup>3</sup>Institute of Biomedical Research of Salamanca (IBSAL), Hospital Universitario de Salamanca, Universidad de Salamanca, Spain

<sup>4</sup>Centro de Investigación Biomédica en Red de Fragilidad y Envejecimiento Saludable (CIBERFES), Madrid, Spain

<sup>5</sup>Nanosyn, Inc., Santa Clara, California, USA

\*Shared first authorship

#Shared last and corresponding authorship ([jbolanos@usal.es](mailto:jbolanos@usal.es); [peter.fedichev.gero.com](mailto:peter.fedichev.gero.com))

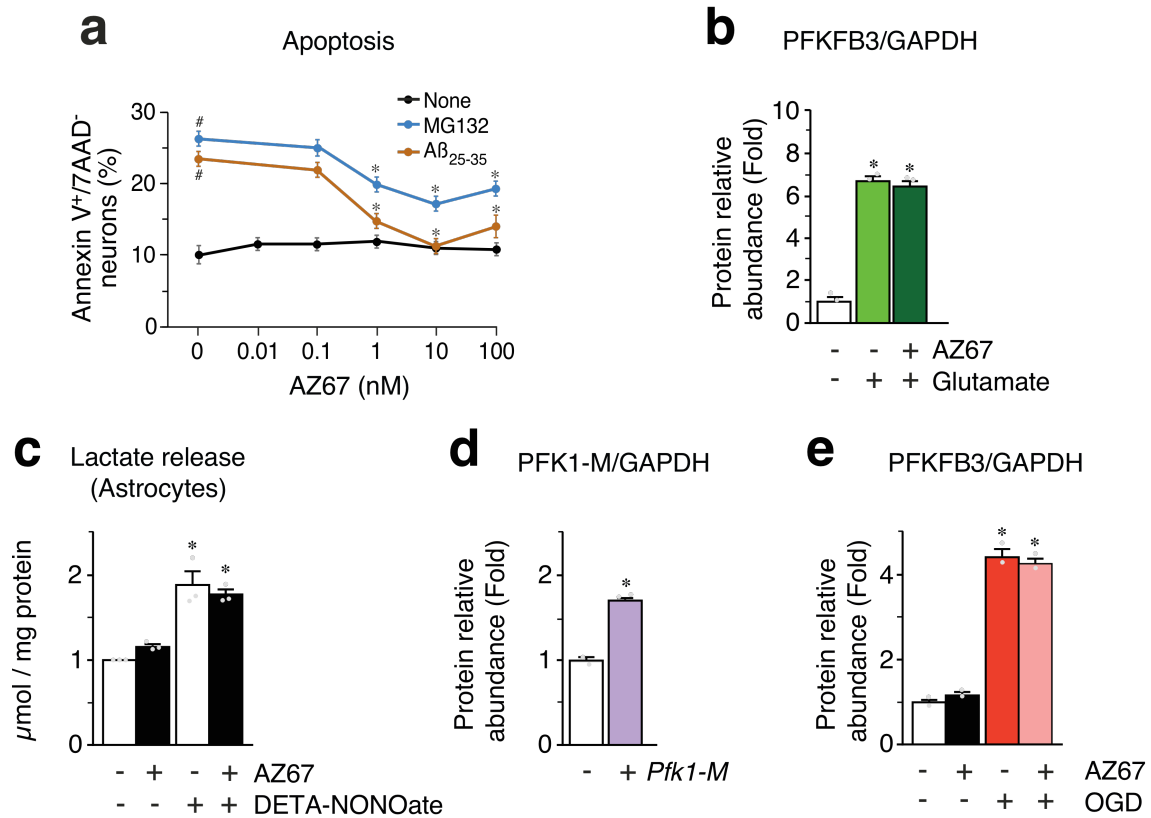

### Supplementary Figure S1 (related to Figures 2 and 3)

**(a)** Incubation of mouse cortical primary neurons with AZ67 for 24 h revealed lack of toxicity. MG132 (10  $\mu$ M; 24 h) or A $\beta$ <sub>25-35</sub> (10  $\mu$ M; 24 h) increased neuronal apoptosis (compare MG132 or A $\beta$ <sub>25-35</sub> versus none values at 0 nM AZ67). Incubation of neurons with AZ67 together with MG132 or A $\beta$ <sub>25-35</sub>, for 24 h, dose-dependently prevented apoptosis. (Related to Figure 2).

**(b)** Relative quantification of the western blots represented in Figure 2a.

**(c)** Incubation of astrocytes with AZ67 for 24 h revealed no effect on lactate release. Treatment of astrocytes with the nitric oxide donor, DETA-NONOate (0.5 mM) increased lactate released after 24 h of incubation. However, incubation of astrocytes with AZ67 was unable to prevent the DETA-NONOate-mediated increase in lactate released.

**(d)** Relative quantification of the western blots represented in Figure 2g.

**(e)** Relative quantification of the western blots represented in Figure 3a.

See also Supplementary Data 2 and Statistics Table 2.

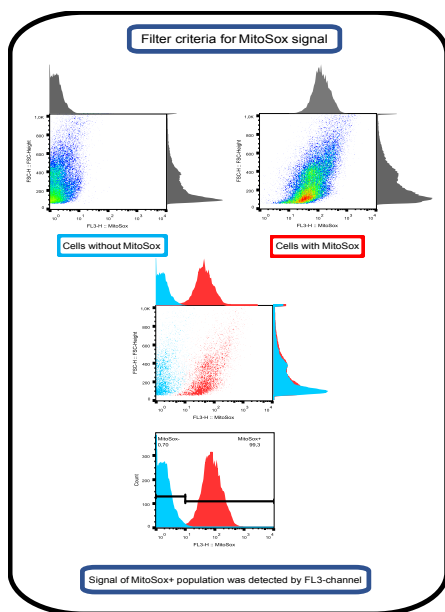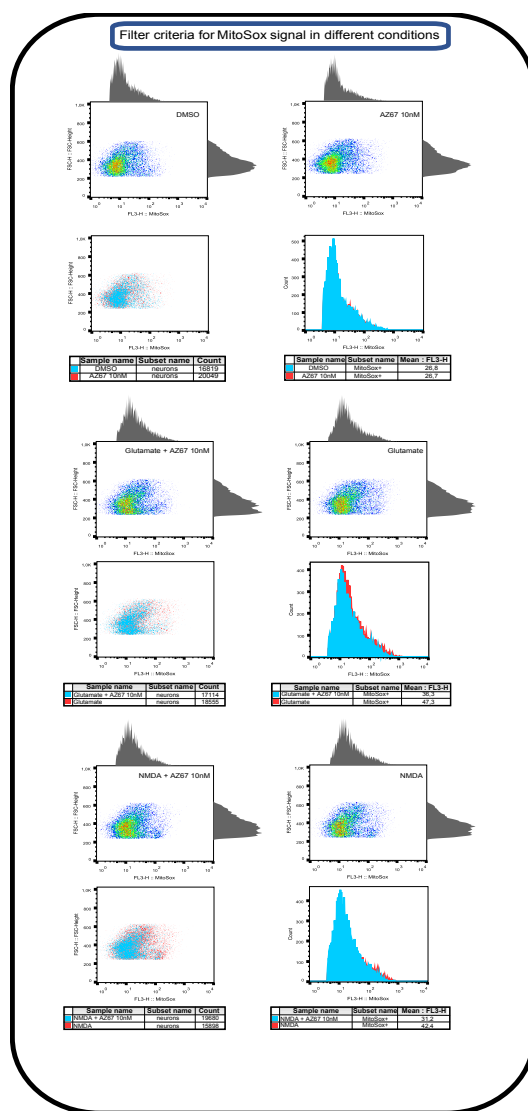

**Supplementary Figure S2 (related to Figures 2 and 3).**

Extended data for flow cytometry workflow for MitoSox.

**Filter criteria for apoptotic cells**

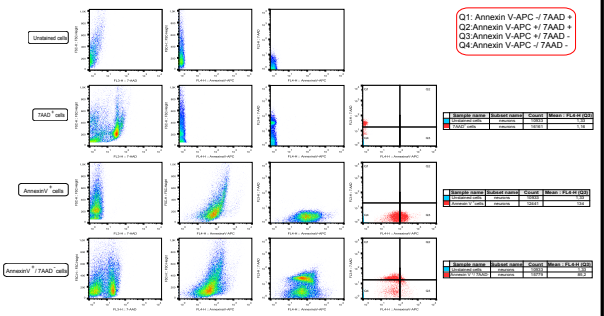

Signal of Annexin V<sup>+</sup>/7AAD<sup>-</sup> population (Q3) was detected by FL4-channel

**Filter criteria for apoptotic cells in different conditions**

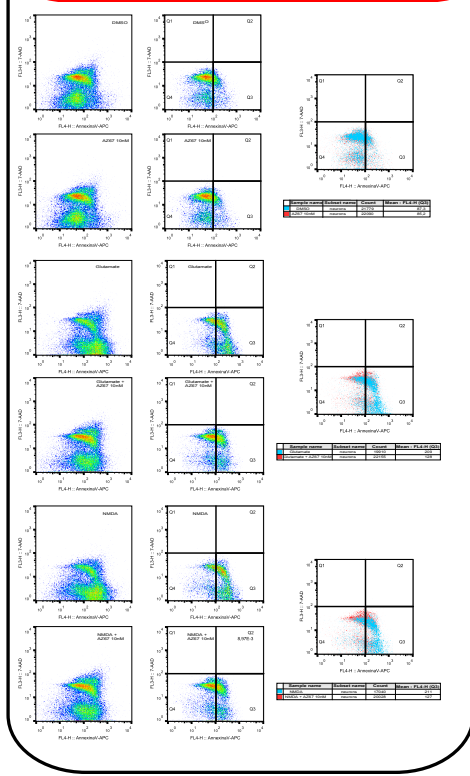

### Supplementary Figure S3 (related to Figures 2 and 3).

Extended data for flow cytometry workflow for apoptosis.

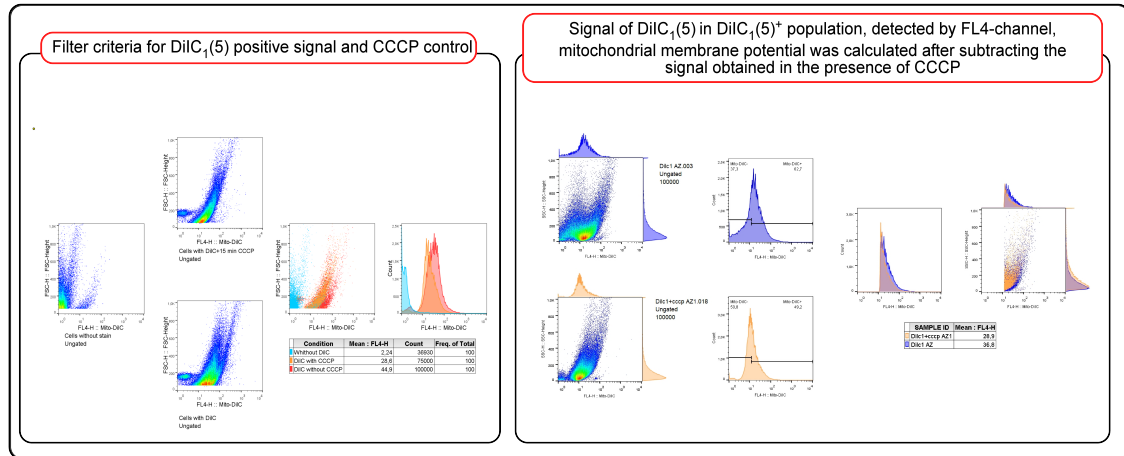

### Supplementary Figure S4 (related to Figure 3).

Extended data for flow cytometry workflow for mitochondrial membrane potential.

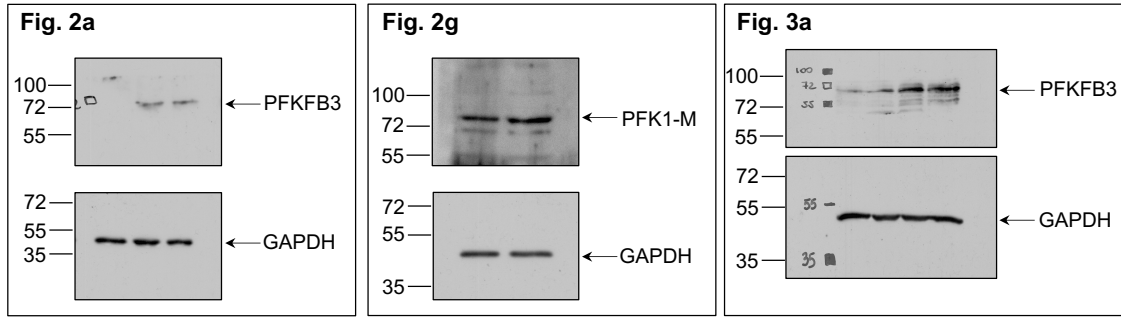

**Supplementary Figure S5 (related to Figures 2 and 3).**

Original western blot replicas.
